# Supplementary material
Source: PubMed Central journal article supplement (PMC7180083)
Supplement: bloodBLD2019004315-suppl1.pdf [file bloodBLD2019004315-suppl1.pdf]

## **SUPPLEMENT**

### **METHODS**

#### **HHV-6B testing**

We tested weekly plasma samples through 6 weeks post-HCT for HHV-6 with quantitative PCR at Viracor Eurofins Laboratory (Lee's Summit, MO). The lower limit of quantification of this assay is 188 copies/mL, and it does not distinguish between species A and B. Among patients with HHV-6 detected using the Viracor assay, we performed additional PCR testing using the highest positive sample per patient to identify the HHV-6 species (A versus B) at the University of Washington Clinical Virology Laboratory (Seattle, WA) as previously described.<sup>1</sup>

### **RESULTS**

#### **HHV-6B plasma detection and timing among patients with any acute graft-versus-host disease (GVHD) and with rash during the study period**

During the study period, acute GVHD grades 2-4 was reported in 37 (40%) patients receiving brincidofovir (median onset, 28 days) and 6 (10%) patients receiving placebo (median onset, 35 days). Of the 37 patients who developed grade  $\geq 2$  GVHD in the brincidofovir arm, first detection of HHV-6B viremia occurred prior to and after the diagnosis of GVHD in 5 (14%) patients and 2 (5%) patients, respectively. Of the 6 patients who developed grade  $\geq 2$  GVHD in the placebo arm, first detection of HHV-6B viremia occurred prior to and after the diagnosis of GVHD in 2 (33%) and 0 (0%) patients, respectively.

Treatment-emergent rash was reported less frequently among patients receiving brincidofovir (n=8, 9%) compared to placebo (n=16, 26%; p=0.006). Of the 8 patients who developed rash in the brincidofovir arm, 1 patient (12.5%) had HHV-6B viremia prior to the rash. Of the 16 patients who developed rash in the placebo arm, 3 patients (19%) had HHV-6B viremia prior to (n=2) or within 4 days after (n=1) the rash.

## References

1. Hill JA, Mayer BT, Xie H, et al. Kinetics of Double-Stranded DNA Viremia after Allogeneic Hematopoietic Cell Transplantation. *Clin. Infect. Dis.* 2018;66(3):.

**Table S1. Maximum grade of acute graft-versus host disease (GVHD) reported during the first 6-weeks after hematopoietic cell transplantation.**

| <b>GVHD severity</b> | <b>Brincidofovir<br/>(N = 92)</b> | <b>Placebo<br/>(N = 61)</b> |
|----------------------|-----------------------------------|-----------------------------|
| Grade 1              | 7 (7.6)                           | 5 (8.2)                     |
| Grade 2              | 15 (16.3)                         | 5 (8.2)                     |
| Grade 3              | 15 (16.3)                         | 1 (1.6)                     |
| Grade 4              | 2 (2.2)                           | 0                           |
| Grade 5              | 5 (5.4)                           | 0                           |

Data are presented as number (%) unless otherwise indicated.

**Table S2. Variables associated with HHV-6B detection in plasma using Cox proportional hazards modeling.**

| Variable                        | Univariate model |                | Multivariate model |                |
|---------------------------------|------------------|----------------|--------------------|----------------|
|                                 | HR (95% CI)      | <i>P</i> value | HR (95% CI)        | <i>P</i> value |
| <b>Treatment arm</b>            |                  | 0.02           |                    | 0.014          |
| Placebo                         | Reference        |                | Reference          |                |
| Brincidofovir                   | 0.5 (0.2 – 0.9)  |                | 0.4 (0.2 – 0.8)    |                |
| <b>Sex</b>                      |                  | 0.89           |                    |                |
| Female                          | Reference        |                | nc                 |                |
| Male                            | 1.0 (0.5 – 1.9)  |                |                    |                |
| <b>Age, years</b>               |                  | 0.04           |                    | 0.09           |
| 18-40                           | Reference        |                | Reference          |                |
| 41-60                           | 0.5 (0.2 – 0.8)  |                | 0.4 (0.1 – 0.9)    |                |
| >60                             | 0.3 (0.1 – 0.8)  |                | 0.5 (0.2 – 1.3)    |                |
| <b>Race</b>                     |                  | 0.49           |                    |                |
| White                           | Reference        |                | nc                 |                |
| African American                | 2.1 (0.8 – 5.6)  |                |                    |                |
| Asian                           | 1.0 (0.2 – 4.1)  |                |                    |                |
| Other                           | nc               |                |                    |                |
| <b>Conditioning regimen</b>     |                  | 0.19           |                    | 0.16           |
| Non-myeloablative               | Reference        |                | Reference          |                |
| Myeloablative                   | 1.6 (0.8 – 3.2)  |                | 1.8 (0.8 – 4.1)    |                |
| <b>Alemtuzumab</b>              |                  |                |                    |                |
| No                              | Reference        | 0.51           | Reference          |                |
| Yes                             | 1.4 (0.5 – 4.1)  |                |                    |                |
| <b>Antithymocyte globulin</b>   |                  | 0.13           |                    | 0.02           |
| No                              | Reference        |                | Reference          |                |
| Yes                             | 0.5 (0.2 – 1.2)  |                | 0.3 (0.1 – 0.8)    |                |
| <b>Ex-vivo T-cell depletion</b> |                  | 0.26           |                    | 0.49           |
| No                              | Reference        |                | Reference          |                |
| Yes                             | 1.7 (0.7 – 4.1)  |                | 1.5 (0.5 – 4.3)    |                |
| <b>Risk category</b>            |                  | 0.88           |                    |                |

|                                    |                 |      |                  |
|------------------------------------|-----------------|------|------------------|
| Low-risk                           | Reference       |      | nc               |
| High-risk                          | 0.9 (0.4-2.0)   |      |                  |
| <b>HCT type</b>                    |                 | 0.10 | 0.09             |
| Matched related                    | Reference       |      | Reference        |
| Cord blood                         | 2.9 (0.9-9.1)   |      | 5.8 (1.4 – 24.1) |
| Haploidentical                     | 2.7 (0.8-8.4)   |      | 2.7 (0.8 – 9.1)  |
| Matched unrelated                  | 0.8 (0.4-1.9)   |      | 1.2 (0.5 – 3.0)  |
| Mismatched                         | 0.9 (0.2-3.3)   |      | 1.5 (0.4 – 5.9)  |
| <b>Time from HCT to first dose</b> |                 | 0.60 |                  |
| ≤1 week                            | Reference       |      | nc               |
| >1 week - ≤2 weeks                 | 1.2 (0.6 – 2.5) |      |                  |
| <b>Acute GVHD<sup>a</sup></b>      |                 | 0.38 |                  |
| Grades 0-1                         | Reference       |      | nc               |
| Grades 2-4                         | 1.9 (0.4 – 8.3) |      |                  |

---

HR indicates hazard ratio; CI, confidence interval; GVHD, graft-versus-host disease; nc, not calculated.

<sup>a</sup>Modeled as a time-dependent covariate.

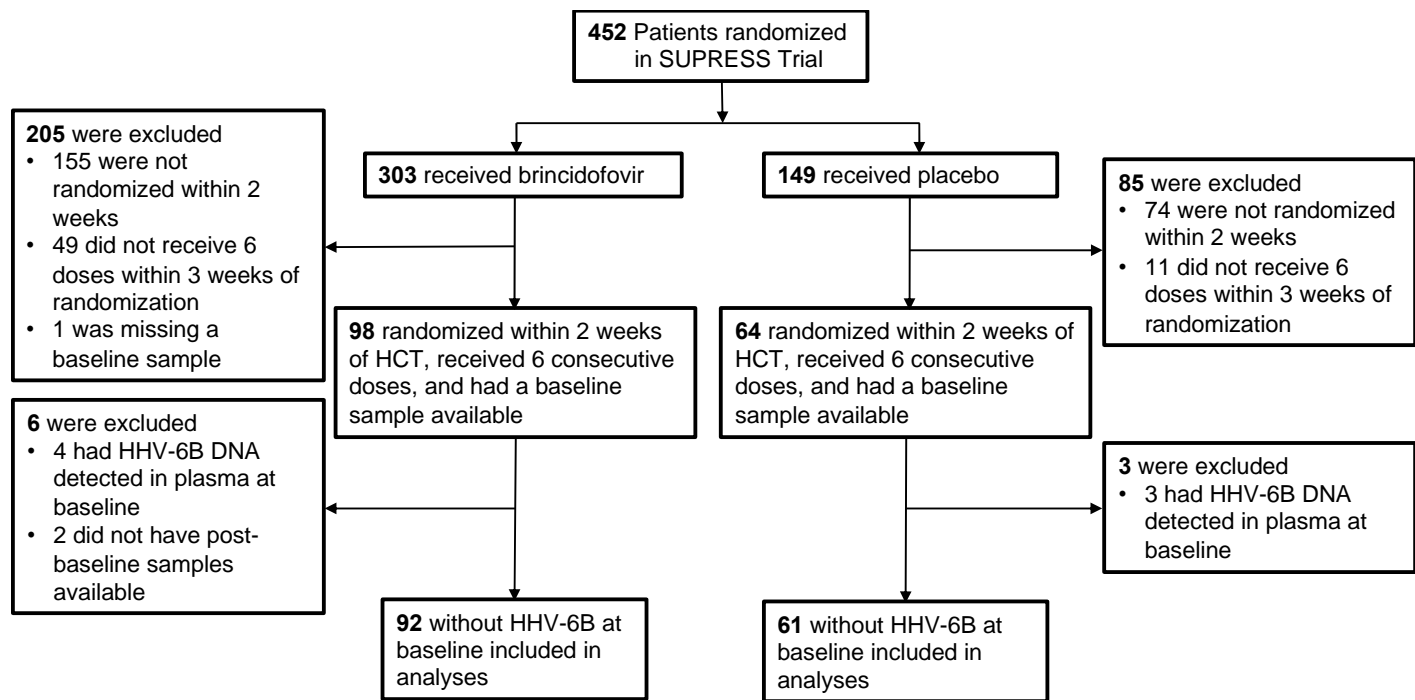

**Figure S1. Consort diagram.**
